# Supplementary material for: Overexpression of Maize ZmC1 and ZmR Transcription Factors in Wheat Regulates Anthocyanin Biosynthesis in a Tissue-Specific Manner
Source: PubMed Central journal article supplement (PMC6887777; doi:10.3390/ijms20225806), 2019-11-19
Supplement: ijms-20-05806-s001.pdf [file ijms-20-05806-s001.pdf]

Supplementary Materials:

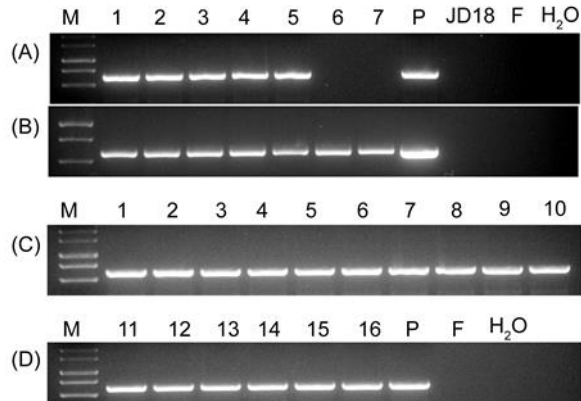

**Figure S1.** Detection of transgenic wheat plants with *ZmC1* and *ZmR* genes by PCR. **A:** PCR amplification for *ZmC1*; **B:** PCR amplification for *ZmR*; 1-5: transgenic plants transformed with expression vector pWMB202; 6-7: transgenic plants transformed with expression vector pWMB197; P: positive control of vector pWMB202; JD18 and F: negative control of wild type Jingdong18 and Fielder, respectively; H<sub>2</sub>O: empty control of sterile water. **C and D:** PCR amplification for *ZmC1*; 1-16: transgenic plants transformed with expression vector pWMB196; P: positive control of vector pWMB196; F: negative control of wild type Fielder; H<sub>2</sub>O: empty control of sterile water.

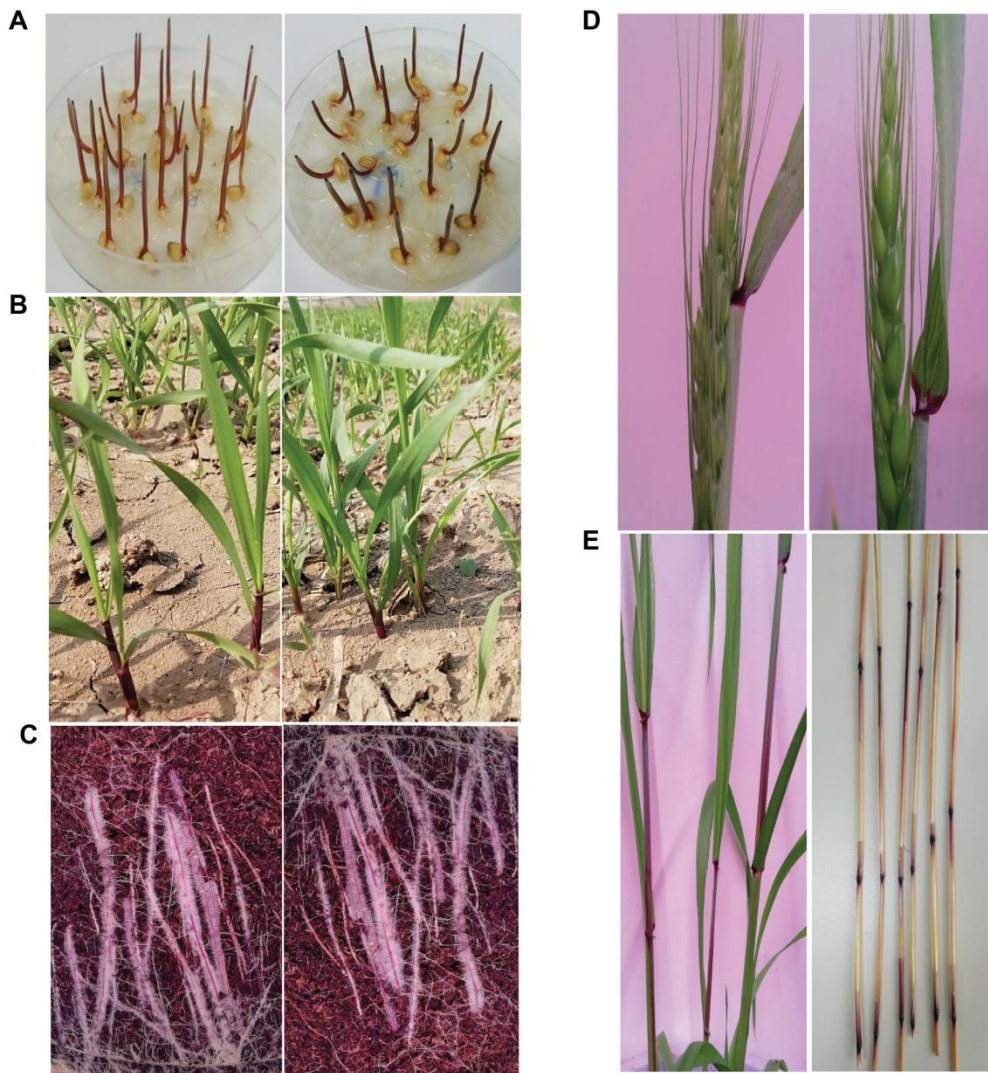

**Figure S2.** Anthocyanin production in the vegetative tissues of transgenic line AL-31. **A:** coleoptiles; **B:** seedlings; **C:** roots; **D:** auricles; **E:** stems.

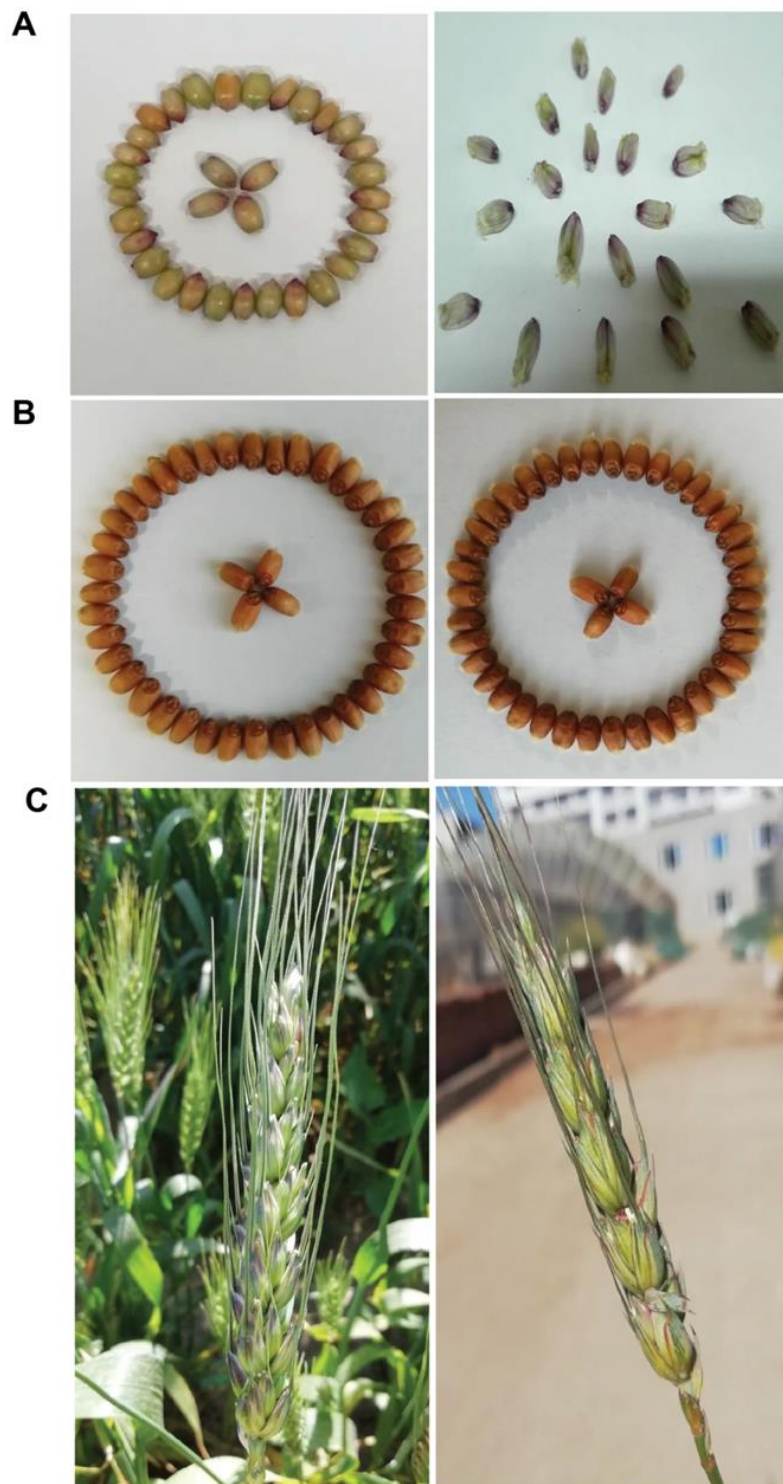

**Figure S3.** Anthocyanin production in the reproductive tissues of transgenic line AL-41. **A:** immature seeds; **B:** mature seeds; **C:** spikes.

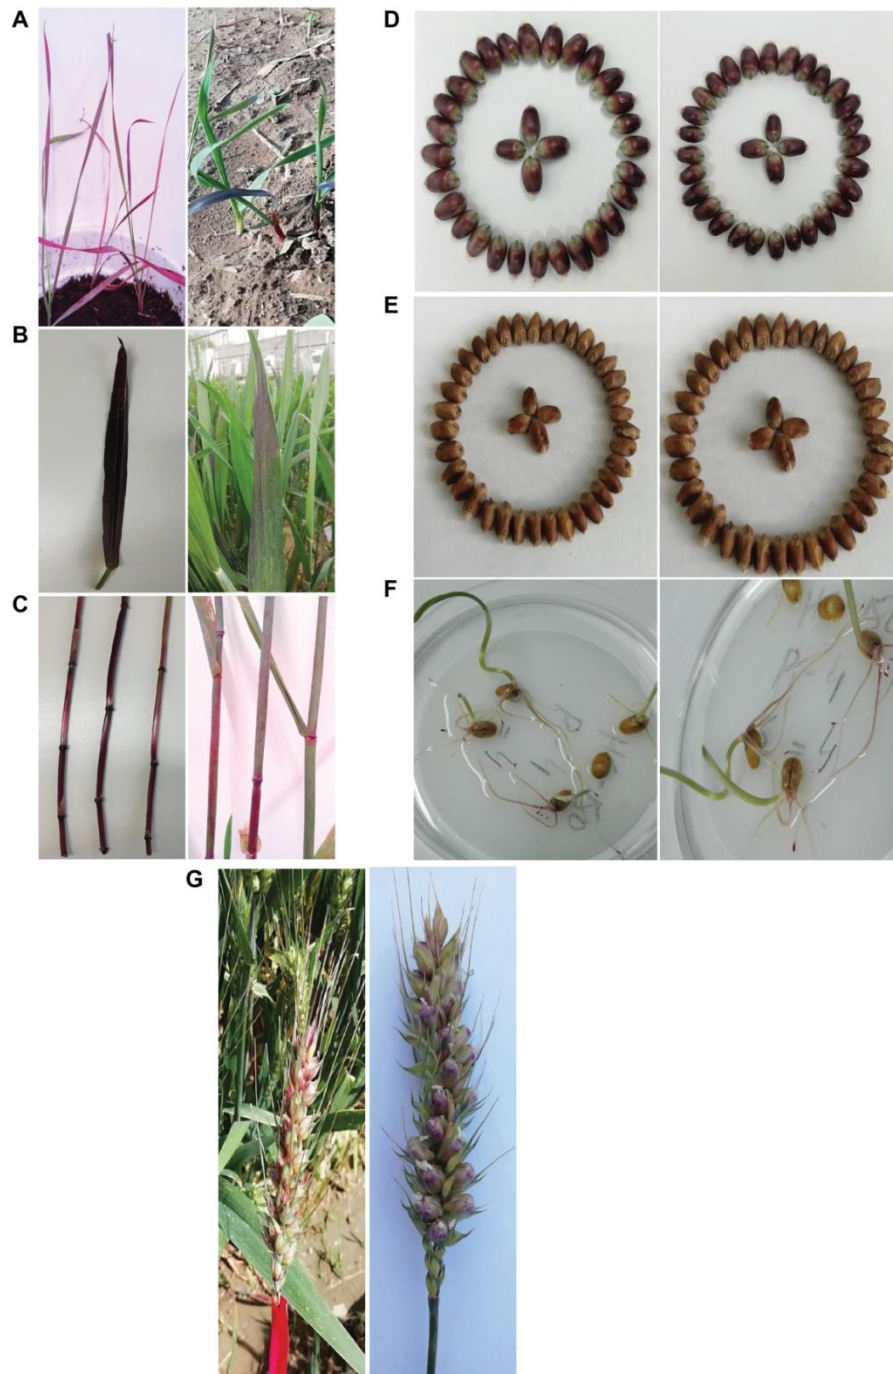

**Figure S4.** Anthocyanin production in the tissues of transgenic line AL-44. **A:** seedlings; **B:** leaves; **C:** stems; **D:** immature seeds; **E:** mature seeds; **F:** germinated roots; **G:** spikes.

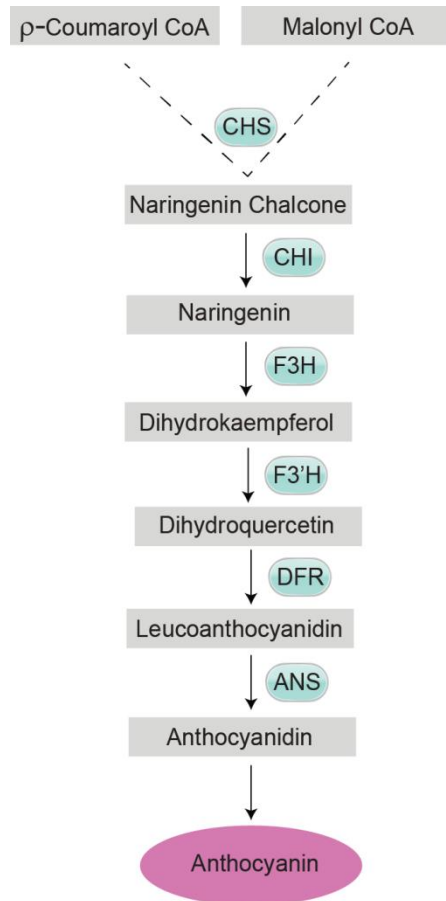

**Figure S5.** Structural genes involved in anthocyanin biosynthesis pathway in wheat.

**A**

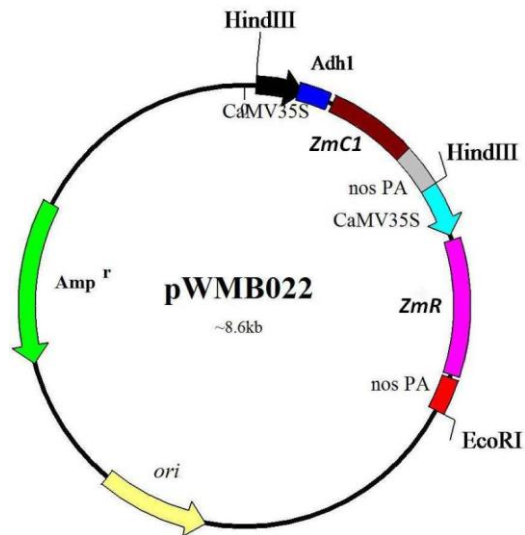

**B**

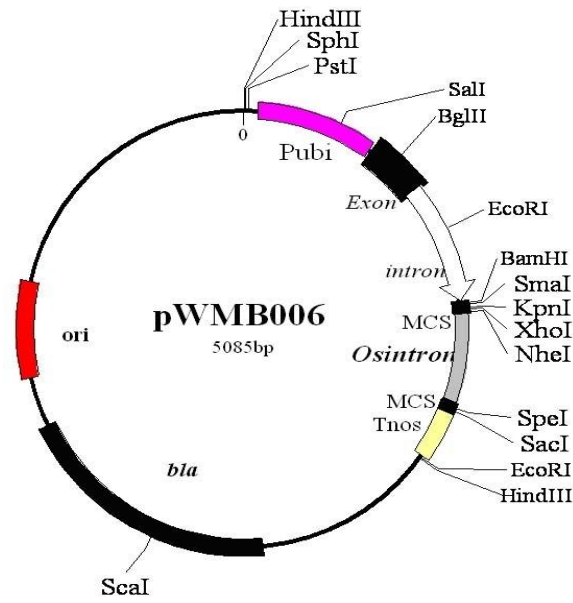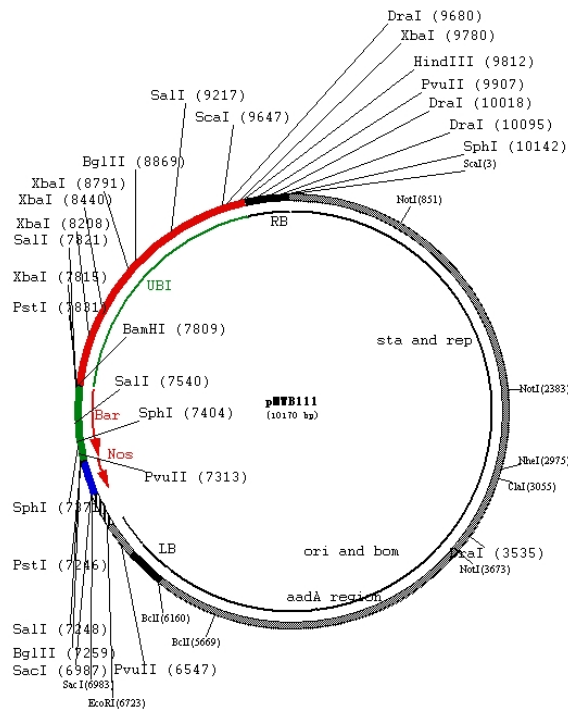

**Figure S6.** Plasmids pWMB022, pWMB006, and pWMB111 used in this study for constructing the expression vectors containing *ZmC1* and *ZmR* genes which are involved in anthocyanin biosynthesis pathway for wheat transformation. A: pWMB022; B: pWMB006; C: pWMB111 carrying *Bar* gene expression cassette.

**Table S1.** Determination of the anthocyanin contents in the transgene wheat lines.

| Transgenic lines | Concentration anthocyanin contents ( $\mu\text{g/g}$ ) |                                 |
|------------------|--------------------------------------------------------|---------------------------------|
|                  | Seeds                                                  | Leaves                          |
| AL-44            | 10.177 $\pm$ 0.180 <sup>b</sup>                        | 96.517 $\pm$ 3.328 <sup>b</sup> |
| AL-45            | 12.954 $\pm$ 0.840 <sup>a</sup>                        | 102.2 $\pm$ 8.029 <sup>a</sup>  |
| AL-30            | 0.0206 $\pm$ 0.009 <sup>c</sup>                        | 0.0307 $\pm$ 0.005 <sup>c</sup> |
| AL-31            | 0.2283 $\pm$ 0.0237 <sup>c</sup>                       | 0.0678 $\pm$ 0.036 <sup>c</sup> |
| AL-31            | 0.1541 $\pm$ 0.023 <sup>c</sup>                        | 0.0159 $\pm$ 0.006 <sup>c</sup> |
| AL-40            | 0.054 $\pm$ 0.070 <sup>c</sup>                         | 0.8205 $\pm$ 0.082 <sup>c</sup> |
| AL-41            | 0.2385 $\pm$ 0.012 <sup>c</sup>                        | 0.5608 $\pm$ 0.041 <sup>c</sup> |
| Fielder          | 0.0861 $\pm$ 0.032 <sup>c</sup>                        | 0.1465 $\pm$ 0.016 <sup>c</sup> |
| Jingdong18(JD18) | 0.0243 $\pm$ 0.008 <sup>c</sup>                        | 0.0579 $\pm$ 0.026 <sup>c</sup> |

<sup>a, b, c</sup> Different letters indicate statistically significant differences ( $P < 0.05$ ).

**Table 1.** Primers used in this study for PCR and quantitative real-time PCR analysis.

| Name             | Forward (5'-3')           | Reverse (5'-3')           |
|------------------|---------------------------|---------------------------|
| <i>ZmC1</i>      | GAAGGCGTTAAGAGAGGGGC      | CCTGCTTCTCCTCCTCCTCCT     |
| <i>ZmR</i>       | CGACATAGAGGCGATGAC        | ACTTGAGGACGAGGAACA        |
| <i>TaADP-RT</i>  | GCTCTCCAACAACATTGCCAAC    | GCTTCTGCCTGTCACATACGC     |
| <i>ZmC1-RT</i>   | GTGGACGAGCAAGGAGGACGAT    | CCTGTGGAGGCGGATGATGAGA    |
| <i>ZmR-RT</i>    | GGTTCTACAACGCGAGGTGAA     | CGGAAGGCGTAGGTCATGGAGA    |
| <i>TaC1-RT</i>   | GGTTGAGAGAGGGAGAGGGGAT    | CGCAGACCAGCTCGCTGC        |
| <i>TaR-RT</i>    | CGGCCTGAGCAGTGTCA         | GTGTCACGCTTCAACAACATCC    |
| <i>TaCHS-RT</i>  | TGGAAAACAACCTACTACATACAGC | CAGACTAACAGGAGATCGAATGCAT |
| <i>TaCHI-RT</i>  | CGTCCTCGTATTTGTCCGCTG     | GAACCATAGTCACATATCACGAGG  |
| <i>TaF3H-RT</i>  | TGATTGATGCGTGGTGGGA       | CAGAAACCAGTACGAAATATACGC  |
| <i>TaF3'H-RT</i> | TAGCTCTCCAGTCTTCCTTGCC    | GCCGTCGGCGTACACGA         |
| <i>TaDFR-RT</i>  | GCTCATCACAGGGAATGAAGC     | GTCGTCGACGCCTGCGA         |
| <i>TaANS-RT</i>  | GAGGACGACCTGCTGCTGAA      | GCCGTTGGTGAGGATGAAGGA     |

\*RT: Used for quantitative real-time PCR.
